## Correction

# Correction: A Role for Homeostatic Drive in the Perpetuation of Complex Chronic Illness: Gulf War Illness and Chronic Fatigue Syndrome

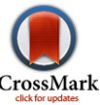

**The PLOS ONE Staff**

There are a number of errors in Figure 1. Please see the corrected Figure 1 here.

---

**Citation:** The PLOS ONE Staff (2014) Correction: A Role for Homeostatic Drive in the Perpetuation of Complex Chronic Illness: Gulf War Illness and Chronic Fatigue Syndrome. PLoS ONE 9(6): e100355. doi:10.1371/journal.pone.0100355

**Published:** June 16, 2014

**Copyright:** © 2014 The PLOS ONE Staff. This is an open-access article distributed under the terms of the Creative Commons Attribution License, which permits unrestricted use, distribution, and reproduction in any medium, provided the original author and source are credited.

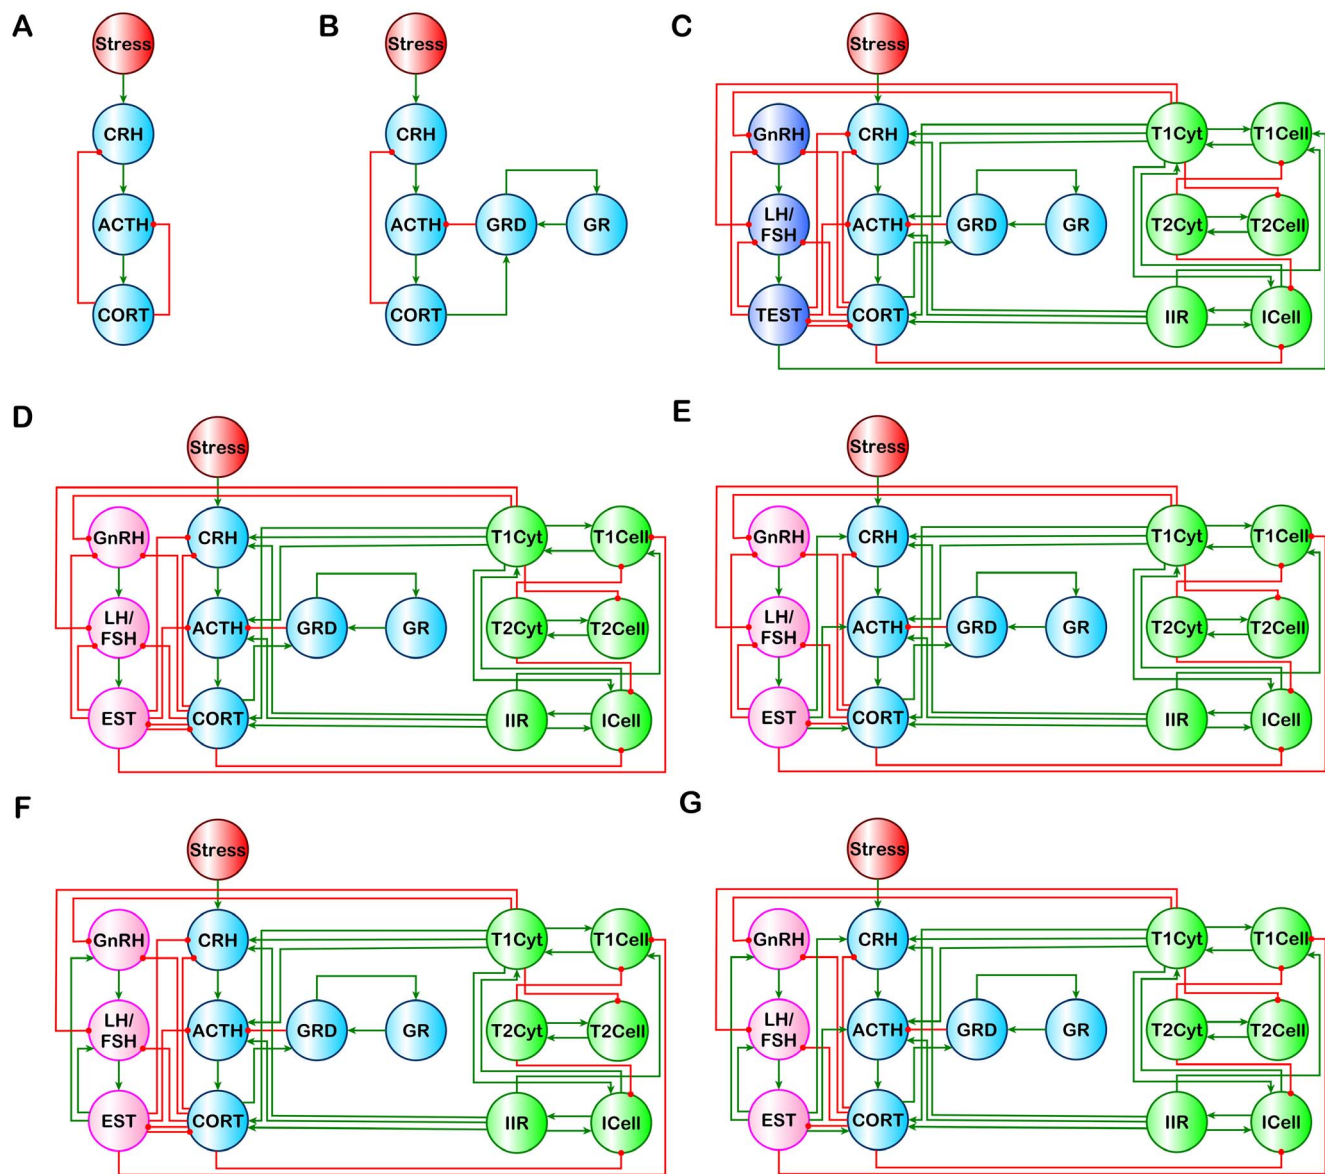

**Figure 1. Standard and extended HPA models.** (A) Standard HPA model. (B) HPA-GR model of Gupta et al. [22]. Integrated models (C) HPA-GR-Immune-HPG for males, and (D) HPA-GR-Immune-HPGb, (E) HPA-GR-Immune-HPGc, (F) HPA-GR-Immune-HPGd, and (G) HPA-GR-Immune-HPGe for females. For (C) – (G) connections between the sex steroid EST and the HPG and HPA components change between stimulatory and inhibitory to capture the effects of the menstrual cycle.  
doi:10.1371/journal.pone.0084839.g001

## Reference

1. Craddock TJA, Fritsch P, Rice MA Jr, del Rosario RM, Miller DB, et al. (2014) A Role for Homeostatic Drive in the Perpetuation of Complex Chronic Illness: Gulf War Illness and Chronic Fatigue Syndrome. PLoS ONE 9(1): e84839. doi:10.1371/journal.pone.0084839
